# Supplementary material
Source: publisher figshare collection journal article supplement (https://gsajournals.figshare.com/ndownloader/files/27843270)
Supplement: Supplementary file 1 [file 27843270]

## Sheet: SNVs
population	replicate	mtDNA position	reference	variant	single stranded substitution type on F-strand	double stranded substitution type	reference base DCS count	variant DCS count	genomic region	gene	synonymous or nonysnonymous	codon change	trinucleotide context
3	3c	122	G	T	G>T	CG->AT	8365	1	CDS	ND6	V>L	GTG>TTG	ANT
3	3b	175	C	T	C>T	CG->TA	10038	1	CDS	ND6	Syn	GAC>GAT	GNT
2	2c	178	T	C	T>C	AT->GC	15169	2	CDS	ND6	Syn	CCT>CCC	TNG
2	2b	234	C	A	C>A	CG->AT	11971	1	CDS	ND6	S>*	TCA>TAA	TNA
2	2c	305	G	T	G>T	CG->AT	14467	1	CDS	ND6	V>L	GTA>TTA	GNT
2	2b	413	A	G	A>G	AT->GC	5403	1	CDS	ND6	R>G	AGA>GGA	ANG
3	3a	721	T	C	T>C	AT->GC	11643	1	CDS	ND4L	L>P	CTG>CCG	CNG
2	2a	726	A	G	A>G	AT->GC	9147	1	CDS	ND4L	M>V	ATG>GTG	TNT
1	1a	729	G	T	G>T	CG->AT	10596	1	CDS	ND4L	V>L	GTA>TTA	GNT
3	3c	760	G	T	G>T	CG->AT	8327	1	CDS	ND4L	G>V	GGT>GTT	GNT
3	3b	916	A	T	A>T	AT->TA	14077	1	rRNA	s-rRNA		.	GNA
3	3b	975	C	T	C>T	CG->TA	17710	1	rRNA	s-rRNA	.	.	TNT
1	1c	999	T	C	T>C	AT->GC	21088	1	rRNA	s-rRNA	.	.	GNG
3	3a	1011	C	T	C>T	CG->TA	21435	1	rRNA	s-rRNA	.	.	CNA
2	2c	1033	G	T	G>T	CG->AT	20726	1	rRNA	s-rRNA	.	.	ANA
3	3c	1185	G	C	G>C	CG->GC	17863	1	rRNA	s-rRNA	.	.	GNT
1	1a	1216	G	T	G>T	CG->AT	21482	2	rRNA	s-rRNA	.	.	ANT
3	3a	1265	G	T	G>T	CG->AT	15606	1	rRNA	s-rRNA	.	.	GNA
1	1b	1291	C	T	C>T	CG->TA	8210	1	rRNA	s-rRNA	.	.	TNA
3	3b	1291	C	T	C>T	CG->TA	11431	1	rRNA	s-rRNA	.	.	TNA
2	2c	1387	C	T	C>T	CG->TA	5099	1	rRNA	s-rRNA	.	.	GNG
2	2b	1543	A	G	A>G	AT->GC	22362	1	rRNA	s-rRNA	.	.	ANG
1	1c	1548	A	G	A>G	AT->GC	25717	2	rRNA	s-rRNA	.	.	GNG
2	2b	1548	A	G	A>G	AT->GC	22415	1	rRNA	s-rRNA	.	.	GNG
1	1a	1551	A	G	A>G	AT->GC	27351	1	rRNA	s-rRNA	.	.	TNA
3	3a	1564	G	T	G>T	CG->AT	25942	1	rRNA	s-rRNA	.	.	ANT
1	1a	1630	G	T	G>T	CG->AT	30698	1	tRNA	tRNA-Ser	.	.	TNA
3	3b	1630	G	T	G>T	CG->AT	25562	1	tRNA	tRNA-Ser	.	.	TNA
1	1a	1637	C	T	C>T	CG->TA	30681	1	tRNA	tRNA-Ser	.	.	ANT
1	1b	1640	G	T	G>T	CG->AT	18456	1	tRNA	tRNA-Ser	.	.	CNT
3	3a	1640	G	T	G>T	CG->AT	27766	1	tRNA	tRNA-Ser	.	.	CNT
3	3b	1643	G	T	G>T	CG->AT	25669	1	tRNA	tRNA-Ser	.	.	ANT
3	3a	1669	A	G	A>G	AT->GC	27433	1	tRNA	tRNA-Asn	.	.	ANT
2	2b	1690	G	T	G>T	CG->AT	25135	1	tRNA	tRNA-Asn	.	.	ANG
1	1a	1696	C	T	C>T	CG->TA	28084	1	tRNA	tRNA-Asn	.	.	GNT
3	3b	1697	C	T	C>T	CG->TA	24293	1	tRNA	tRNA-Asn	.	.	ANG
3	3b	1716	G	T	G>T	CG->AT	23146	1	tRNA	tRNA-Tyr	.	.	ANT
2	2a	1758	T	A	T>A	AT->TA	18154	1	tRNA	tRNA-Tyr	.	.	GNG
1	1a	1816	A	G	A>G	AT->GC	24725	1	CDS	ND1	Syn	AGA>AGG	GNA
2	2c	1875	G	A	G>A	CG->TA	25060	1	CDS	ND1	G>E	GGG>GAG	GNG
3	3b	1875	G	A	G>A	CG->TA	23486	1	CDS	ND1	G>E	GGG>GAG	GNG
2	2b	1877	C	T	C>T	CG->TA	23456	1	CDS	ND1	P>S	CCC>TCC	GNC
1	1c	1890	C	T	C>T	CG->TA	27523	1	CDS	ND1	T>I	ACA>ATA	TNT
3	3c	1922	G	A	G>A	CG->TA	21937	1	CDS	ND1	G>R	GGG>AGG	TNG
2	2b	1925	G	A	G>A	CG->TA	20650	1	CDS	ND1	V>I	GTT>ATT	GNT
3	3b	2124	G	T	G>T	CG->AT	11169	1	CDS	ND1	S>I	AGC>ATC	ANC
1	1a	2374	A	G	A>G	AT->GC	17532	1	CDS	ND1	Syn	GGA>GGG	GNT
2	2c	2394	G	A	G>A	CG->TA	16889	1	CDS	ND1	R>K	AGA>AAA	ANA
1	1a	2761	G	T	G>T	CG->AT	13302	1	CDS	ATP6	R>I	AGA>ATA	ANA
3	3b	2780	A	G	A>G	AT->GC	13854	1	CDS	ATP6	Syn	CCA>CCG	CNT
3	3b	2830	G	T	G>T	CG->AT	21608	1	CDS	ATP6	C>F	TGT>TTT	TNT
2	2c	2852	C	T	C>T	CG->TA	22811	1	CDS	ATP6	Syn	TAC>TAT	ANT
3	3b	2862	C	A	C>A	CG->AT	24704	4	CDS	ATP6	P>T	CCT>ACT	GNA
1	1b	2901	G	T	G>T	CG->AT	19082	1	CDS	ATP6	V>L	GTA>TTA	TNT
2	2b	2905	C	T	C>T	CG->TA	23959	1	CDS	ATP6	A>V	GCG>GTG	CNC
1	1c	2914	G	T	G>T	CG->AT	29522	1	CDS	ATP6	S>I	AGT>ATT	ANT
2	2c	2948	T	C	T>C	AT->GC	23432	1	CDS	ATP6	Syn	TTT>TTC	ANA
3	3b	3039	G	A	G>A	CG->TA	27436	1	CDS	ATP6	A>T	GCT>ACT	TNC
1	1a	3051	C	T	C>T	CG->TA	32156	1	CDS	ATP6	R>C	CGT>TGT	CNC
1	1a	3074	T	C	T>C	AT->GC	30384	1	CDS	ATP6	Syn	GTT>GTC	CNA
3	3b	3084	G	T	G>T	CG->AT	25437	1	CDS	ATP6	V>F	GTT>TTT	ANT
1	1a	3095	G	A	G>A	CG->TA	27370	1	CDS	ATP6	Syn	ATG>ATA	TNC
1	1b	3111	G	T	G>T	CG->AT	14820	1	CDS	ATP6	E>*	GAA>TAA	ANA
1	1c	3139	G	T	G>T	CG->AT	17283	1	CDS	ATP6	W>L	TGA>TTA	TNA
1	1c	3254	C	T	C>T	CG->TA	3356	1	tRNA	tRNA-Lys	.	.	ANT
1	1a	3342	G	C	G>C	CG->GC	23041	1	tRNA	tRNA-Leu	.	.	CNC
1	1a	3400	G	T	G>T	CG->AT	26285	1	tRNA	tRNA-Ser	.	.	GNT
2	2b	3481	G	T	G>T	CG->AT	15735	1	CDS	ND2	V>F	GTT>TTT	CNT
3	3c	3558	C	T	C>T	CG->TA	9143	1	CDS	ND2	Syn	ACC>ACT	TNG
3	3c	3597	T	A	T>A	AT->TA	10916	3	CDS	ND2	Syn	GGT>GGA	ANC
2	2b	3668	C	T	C>T	CG->TA	13129	4	CDS	ND2	P>L	CCG>CTG	CNG
2	2a	3676	T	C	T>C	AT->GC	11959	1	CDS	ND2	F>L	TTT>CTT	ANG
2	2c	3736	T	A	T>A	AT->TA	15274	1	CDS	ND2	F>I	TTT>ATT	ANT
2	2a	3752	T	A	T>A	AT->TA	10322	1	CDS	ND2	F>Y	TTT>TAT	ANA
3	3a	3821	G	T	G>T	CG->AT	12595	3	CDS	ND2	C>F	TGT>TTT	TNT
3	3b	3880	G	A	G>A	CG->TA	5755	1	CDS	ND2	E>K	GAG>AAG	ANA
3	3a	4379	C	T	C>T	CG->TA	15848	1	tRNA	tRNA-Arg	.	.	TNT
3	3a	4437	C	T	C>T	CG->TA	17572	1	tRNA	tRNA-Gln	.	.	TNC
3	3c	4458	T	C	T>C	AT->GC	12590	1	tRNA	tRNA-Phe	.	.	ANA
2	2c	4565	G	T	G>T	CG->AT	16537	2	CDS	CYTB	R>I	AGA>ATA	ANA
1	1a	4625	A	T	A>T	AT->TA	22639	1	CDS	CYTB	Q>L	CAG>CTG	CNG
3	3c	4754	C	T	C>T	CG->TA	11929	1	CDS	CYTB	A>V	GCC>GTC	GNC
3	3b	4762	T	A	T>A	AT->TA	11153	3	CDS	CYTB	F>I	TTT>ATT	ANT
1	1c	4828	G	A	G>A	CG->TA	11072	1	CDS	CYTB	V>I	GTA>ATA	ANT
2	2b	4832	G	T	G>T	CG->AT	11403	1	CDS	CYTB	W>L	TGA>TTA	TNA
2	2b	4863	A	G	A>G	AT->GC	13592	1	CDS	CYTB	Syn	GTA>GTG	TNA
2	2a	4901	C	A	C>A	CG->AT	15171	1	CDS	CYTB	A>D	GCT>GAT	ANC
1	1c	4924	G	T	G>T	CG->AT	27247	1	CDS	CYTB	V>L	GTA>TTA	ANT
3	3a	4953	T	C	T>C	AT->GC	25391	1	CDS	CYTB	Syn	ATT>ATC	GNA
1	1b	4966	C	T	C>T	CG->TA	21573	1	CDS	CYTB	P>S	CCA>TCA	GNC
2	2b	4991	G	T	G>T	CG->AT	27608	2	CDS	CYTB	R>I	AGA>ATA	ANA
3	3c	5013	A	C	A>C	AT->CG	33111	1	CDS	CYTB	Syn	GCA>GCC	CNA
3	3c	5054	G	A	G>A	CG->TA	34654	1	CDS	CYTB	W>*	TGA>TAA	TNA
2	2a	5062	C	T	C>T	CG->TA	18239	1	CDS	CYTB	Syn	CTA>TTA	ANA
3	3a	5062	C	T	C>T	CG->TA	27428	1	CDS	CYTB	Syn	CTA>TTA	ANA
2	2a	5071	G	T	G>T	CG->AT	18282	1	CDS	CYTB	V>L	GTA>TTA	TNT
2	2c	5078	G	A	G>A	CG->TA	25866	2	CDS	CYTB	G>E	GGG>GAG	GNG
1	1a	5079	G	T	G>T	CG->AT	34959	1	CDS	CYTB	Syn	GGG>GGT	GNC
1	1a	5079	G	A	G>A	CG->TA	32442	1	CDS	CYTB	Syn	GGG>GGA	GNC
1	1c	5079	G	A	G>A	CG->TA	38890	158	CDS	CYTB	Syn	GGG>GGA	GNC
2	2a	5079	G	T	G>T	CG->AT	18278	1	CDS	CYTB	Syn	GGG>GGT	GNC
2	2a	5079	G	A	G>A	CG->TA	18278	5	CDS	CYTB	Syn	GGG>GGA	GNC
3	3c	5079	G	A	G>A	CG->TA	34029	4	CDS	CYTB	Syn	GGG>GGA	GNC
1	1a	5080	C	T	C>T	CG->TA	34796	1	CDS	CYTB	H>Y	CAT>TAT	TNC
3	3c	5080	C	A	C>A	CG->AT	33887	1	CDS	CYTB	H>N	CAT>AAT	TNC
3	3c	5080	C	T	C>T	CG->TA	33887	1	CDS	CYTB	H>Y	CAT>TAT	TNC
2	2a	5111	C	T	C>T	CG->TA	18381	1	CDS	CYTB	T>I	ACA>ATA	TNT
3	3a	5115	T	C	T>C	AT->GC	27591	1	CDS	CYTB	Syn	TCT>TCC	TNG
3	3b	5119	T	C	T>C	AT->GC	28271	1	CDS	CYTB	Syn	TTA>CTA	ANC
1	1c	5158	C	A	C>A	CG->AT	36833	1	CDS	CYTB	P>T	CCT>ACT	GNT
3	3c	5186	A	T	A>T	AT->TA	29350	1	CDS	CYTB	N>I	AAT>ATT	ANT
1	1c	5286	A	T	A>T	AT->TA	35980	1	CDS	CYTB	Syn	CCA>CCT	CNG
1	1a	5299	C	T	C>T	CG->TA	31200	1	CDS	CYTB	P>S	CCA>TCA	GNA
1	1a	5353	G	T	G>T	CG->AT	22948	1	CDS	CYTB	V>F	GTC>TTC	ANT
3	3a	5359	G	A	G>A	CG->TA	20625	1	CDS	CYTB	G>R	GGG>AGG	ANG
1	1a	5361	G	A	G>A	CG->TA	21145	1	CDS	CYTB	Syn	GGG>GGA	GNG
3	3c	5369	C	A	C>A	CG->AT	18849	1	CDS	CYTB	A>D	GCT>GAT	ANC
2	2b	5386	G	T	G>T	CG->AT	12194	1	CDS	CYTB	V>L	GTA>TTA	CNT
1	1c	5630	G	T	G>T	CG->AT	5422	1	tRNA	tRNA-Leu	.	.	ANT
1	1a	5656	T	C	T>C	AT->GC	9380	1	tRNA	tRNA-Leu	.	.	ANC
3	3c	5663	G	C	G>C	CG->GC	8513	1	tRNA	tRNA-Leu	.	.	ANA
2	2c	5738	T	A	T>A	AT->TA	19334	1	CDS	COX3	S>T	TCA>ACA	GNG
3	3a	5781	G	A	G>A	CG->TA	21268	1	CDS	COX3	G>E	GGA>GAA	GNA
3	3a	5829	C	T	C>T	CG->TA	23036	1	CDS	COX3	S>F	TCT>TTT	ANA
1	1c	5887	C	T	C>T	CG->TA	28016	1	CDS	COX3	Syn	TTC>TTT	CNA
3	3b	5961	G	C	G>C	CG->GC	23995	1	CDS	COX3	W>S	TGA>TCA	TNA
1	1c	5976	C	T	C>T	CG->TA	31982	1	CDS	COX3	A>V	GCT>GTT	ANC
2	2a	5976	C	T	C>T	CG->TA	16256	1	CDS	COX3	A>V	GCT>GTT	ANC
3	3c	6003	G	T	G>T	CG->AT	29732	1	CDS	COX3	G>V	GGA>GTA	GNA
3	3c	6003	G	A	G>A	CG->TA	29732	1	CDS	COX3	G>E	GGA>GAA	GNA
1	1c	6013	A	G	A>G	AT->GC	33075	1	CDS	COX3	Syn	TGA>TGG	GNT
3	3b	6031	C	T	C>T	CG->TA	23762	1	CDS	COX3	Syn	CAC>CAT	ANT
3	3c	6035	G	T	G>T	CG->AT	28130	1	CDS	COX3	V>F	GTT>TTT	ANT
2	2a	6078	T	C	T>C	AT->GC	16287	1	CDS	COX3	L>S	TTA>TCA	TNA
1	1a	6180	C	T	C>T	CG->TA	30834	1	CDS	COX3	T>I	ACA>ATA	TNT
3	3c	6265	A	T	A>T	AT->TA	28623	1	CDS	COX3	Syn	GGA>GGT	GNT
2	2b	6266	T	A	T>A	AT->TA	26543	1	CDS	COX3	F>I	TTT>ATT	ANT
2	2b	6267	T	C	T>C	AT->GC	26533	1	CDS	COX3	F>S	TTT>TCT	ANA
1	1c	6368	T	C	T>C	AT->GC	23023	1	CDS	COX3	F>L	TTT>CTT	ANT
1	1a	6460	T	A	T>A	AT->TA	11644	1	tRNA	tRNA-Thr	.	.	ANC
1	1c	7093	T	A	T>A	AT->TA	27103	1	CDS	ND4	Syn	GCT>GCA	CNG
1	1a	7100	C	A	C>A	CG->AT	27721	1	CDS	ND4	L>I	CTA>ATA	ANT
1	1c	7239	C	T	C>T	CG->TA	39827	1	CDS	ND4	A>V	GCT>GTT	ANC
3	3b	7247	G	T	G>T	CG->AT	27771	1	CDS	ND4	A>S	GCT>TCT	ANC
3	3a	7259	G	T	G>T	CG->AT	26142	1	CDS	ND4	V>F	GTC>TTC	ANT
1	1a	7362	T	C	T>C	AT->GC	28498	1	CDS	ND4	L>P	CTT>CCT	ANG
2	2a	7393	T	C	T>C	AT->GC	15942	1	CDS	ND4	Syn	CAT>CAC	TNT
1	1c	7404	G	A	G>A	CG->TA	20341	1	CDS	ND4	R>K	AGG>AAG	ANG
3	3b	7751	T	C	T>C	AT->GC	5998	1	intergenic	.	.	.	GNT
2	2a	7908	G	T	G>T	CG->AT	11161	1	CDS	COX1	D>Y	GAT>TAT	ANA
3	3c	7908	G	A	G>A	CG->TA	14808	1	CDS	COX1	D>N	GAT>AAT	ANA
3	3a	7942	G	T	G>T	CG->AT	19331	1	CDS	COX1	W>L	TGA>TTA	TNA
2	2c	8027	G	A	G>A	CG->TA	22284	1	CDS	COX1	Syn	TTG>TTA	TNT
1	1a	8035	C	T	C>T	CG->TA	28949	1	CDS	COX1	S>L	TCA>TTA	TNA
2	2a	8049	C	T	C>T	CG->TA	15049	1	CDS	COX1	H>Y	CAT>TAT	TNA
2	2a	8051	T	C	T>C	AT->GC	14888	1	CDS	COX1	Syn	CAT>CAC	CNT
2	2b	8121	C	T	C>T	CG->TA	22696	1	CDS	COX1	L>F	CTT>TTT	ANT
2	2b	8128	T	C	T>C	AT->GC	22977	5	CDS	COX1	L>S	TTA>TCA	TNA
1	1a	8202	A	G	A>G	AT->GC	29410	1	CDS	COX1	I>V	ATT>GTT	ANT
2	2b	8252	C	A	C>A	CG->AT	25949	1	CDS	COX1	Syn	GTC>GTA	ANA
3	3b	8272	T	G	T>G	AT->CG	26561	1	CDS	COX1	M>R	ATG>AGG	CNT
3	3a	8284	G	T	G>T	CG->AT	26943	1	CDS	COX1	G>V	GGA>GTA	GNA
2	2b	8302	C	T	C>T	CG->TA	26570	1	CDS	COX1	A>V	GCT>GTT	ANC
2	2b	8325	G	T	G>T	CG->AT	26945	1	CDS	COX1	G>W	GGG>TGG	ANG
1	1b	8326	G	C	G>C	CG->GC	22650	1	CDS	COX1	G>A	GGG>GCG	GNG
1	1b	8335	C	T	C>T	CG->TA	21927	2	CDS	COX1	S>F	TCT>TTT	ANA
3	3a	8338	T	C	T>C	AT->GC	27032	1	CDS	COX1	I>T	ATC>ACC	GNT
3	3a	8380	G	T	G>T	CG->AT	27850	2	CDS	COX1	R>L	CGT>CTT	CNT
1	1b	8386	G	T	G>T	CG->AT	20114	1	CDS	COX1	S>I	AGT>ATT	ANT
1	1a	8395	C	T	C>T	CG->TA	32576	1	CDS	COX1	S>L	TCA>TTA	TNA
3	3a	8395	C	T	C>T	CG->TA	27410	1	CDS	COX1	S>L	TCA>TTA	TNA
3	3a	8410	C	T	C>T	CG->TA	27698	1	CDS	COX1	T>I	ACT>ATT	ANT
1	1a	8464	C	G	C>G	CG->GC	33702	1	CDS	COX1	P>R	CCG>CGG	CNG
3	3a	8478	G	T	G>T	CG->AT	27665	1	CDS	COX1	A>S	GCT>TCT	GNC
1	1a	8489	G	T	G>T	CG->AT	34095	1	CDS	COX1	M>I	ATG>ATT	TNT
1	1c	8503	G	A	G>A	CG->TA	37005	1	CDS	COX1	R>H	CGT>CAT	CNT
3	3c	8503	G	T	G>T	CG->AT	32755	1	CDS	COX1	R>L	CGT>CTT	CNT
1	1c	8620	G	T	G>T	CG->AT	43372	1	CDS	COX1	G>V	GGT>GTT	GNT
3	3b	8641	T	C	T>C	AT->GC	29768	1	CDS	COX1	L>P	CTT>CCT	ANG
3	3c	8664	G	T	G>T	CG->AT	38668	1	CDS	COX1	V>F	GTT>TTT	ANT
2	2b	8672	T	A	T>A	AT->TA	29794	8	CDS	COX1	Syn	GGT>GGA	CNC
3	3b	8680	G	T	G>T	CG->AT	30300	1	CDS	COX1	G>V	GGT>GTT	GNT
1	1b	8723	A	G	A>G	AT->GC	34883	1	CDS	COX1	Syn	GTA>GTG	TNG
3	3b	8741	G	A	G>A	CG->TA	32124	1	CDS	COX1	Syn	ATG>ATA	TNT
3	3b	8773	C	A	C>A	CG->AT	32644	1	CDS	COX1	A>D	GCT>GAT	ANC
1	1b	8794	T	C	T>C	AT->GC	35986	1	CDS	COX1	I>T	ATA>ACA	TNT
3	3b	8794	T	C	T>C	AT->GC	32385	1	CDS	COX1	I>T	ATA>ACA	TNT
3	3b	8796	G	T	G>T	CG->AT	32516	2	CDS	COX1	V>F	GTT>TTT	ANT
1	1c	8803	C	T	C>T	CG->TA	50495	1	CDS	COX1	A>V	GCA>GTA	TNC
3	3a	8812	C	T	C>T	CG->TA	30014	1	CDS	COX1	T>I	ACA>ATA	TNT
1	1b	8862	G	T	G>T	CG->AT	30002	1	CDS	COX1	V>L	GTA>TTA	GNT
3	3a	8882	G	A	G>A	CG->TA	29056	1	CDS	COX1	Syn	TTG>TTA	TNT
3	3a	8884	G	A	G>A	CG->TA	29075	1	CDS	COX1	W>*	TGA>TAA	TNA
3	3a	8891	G	A	G>A	CG->TA	28539	1	CDS	COX1	Syn	TTG>TTA	TNG
2	2c	8919	G	A	G>A	CG->TA	25328	1	CDS	COX1	G>R	GGG>AGG	TNG
3	3a	8926	C	G	C>G	CG->GC	27815	1	CDS	COX1	T>R	ACA>AGA	TNT
3	3c	8989	G	A	G>A	CG->TA	31093	1	CDS	COX1	R>K	AGA>AAA	ANA
1	1b	8999	T	C	T>C	AT->GC	22188	1	CDS	COX1	Syn	CAT>CAC	ANT
1	1c	8999	T	C	T>C	AT->GC	34443	1	CDS	COX1	Syn	CAT>CAC	ANT
2	2c	8999	T	C	T>C	AT->GC	24974	1	CDS	COX1	Syn	CAT>CAC	ANT
2	2a	9031	T	A	T>A	AT->TA	17163	1	CDS	COX1	I>N	ATT>AAT	ANT
1	1c	9037	C	T	C>T	CG->TA	31395	1	CDS	COX1	T>M	ACG>ATG	CNT
2	2a	9100	C	A	C>A	CG->AT	15326	1	CDS	COX1	A>E	GCA>GAA	TNC
1	1c	9144	C	T	C>T	CG->TA	20762	1	CDS	COX1	P>S	CCG>TCG	GNG
2	2c	9144	C	T	C>T	CG->TA	20784	1	CDS	COX1	P>S	CCG>TCG	GNG
1	1c	9166	A	T	A>T	AT->TA	21758	1	CDS	COX1	H>L	CAC>CTC	CNC
3	3c	9236	T	C	T>C	AT->GC	20134	1	CDS	COX1	Syn	GGT>GGC	ANC
2	2c	9252	G	T	G>T	CG->AT	21832	1	CDS	COX1	A>S	GCA>TCA	TNC
2	2a	9342	G	A	G>A	CG->TA	13963	1	CDS	COX1	E>K	GAG>AAG	TNA
2	2b	9431	G	T	G>T	CG->AT	12283	1	tRNA	tRNA-Cys	.	.	ANT
3	3c	9641	G	T	G>T	CG->AT	13021	1	tRNA	tRNA-Gly	.	.	TNA
2	2c	9795	T	C	T>C	AT->GC	14488	1	CDS	COX2	Syn	GGT>GGC	TNC
2	2c	9900	G	A	G>A	CG->TA	16155	1	CDS	COX2	Syn	AGG>AGA	GNC
3	3a	10058	G	T	G>T	CG->AT	29063	1	CDS	COX2	R>L	CGT>CTT	CNT
1	1a	10084	G	A	G>A	CG->TA	40307	1	CDS	COX2	V>I	GTT>ATT	TNT
3	3c	10147	G	A	G>A	CG->TA	40696	2	CDS	COX2	A>T	GCA>ACA	GNC
3	3c	10212	G	T	G>T	CG->AT	35475	1	CDS	COX2	Syn	AGG>AGT	GNT
2	2b	10216	C	T	C>T	CG->TA	28636	1	CDS	COX2	P>S	CCT>TCT	GNA
2	2c	10222	G	C	G>C	CG->GC	26228	1	CDS	COX2	V>L	GTG>CTG	ANT
3	3c	10226	G	A	G>A	CG->TA	34321	1	CDS	COX2	G>E	GGA>GAA	GNA
2	2a	10317	A	G	A>G	AT->GC	15034	2	CDS	COX2	Syn	AAA>AAG	ANA
1	1c	10412	C	A	C>A	CG->AT	12265	1	rRNA	l-rRNA	.	.	ANT
3	3b	10828	T	C	T>C	AT->GC	13188	1	rRNA	l-rRNA	.	.	TNG
3	3c	10859	G	A	G>A	CG->TA	17147	1	rRNA	l-rRNA	.	.	GNA
3	3a	10907	A	G	A>G	AT->GC	11182	1	rRNA	l-rRNA	.	.	GNA
3	3a	10937	T	C	T>C	AT->GC	6289	1	rRNA	l-rRNA	.	.	ANA
1	1c	11093	G	T	G>T	CG->AT	6359	1	rRNA	l-rRNA	.	.	ANA
3	3b	11195	C	A	C>A	CG->AT	14269	1	rRNA	l-rRNA	.	.	ANC
3	3b	11642	G	A	G>A	CG->TA	10115	1	CDS	ND3	G>E	GGA>GAA	GNA
1	1a	11701	C	T	C>T	CG->TA	8555	1	CDS	ND5	S>F	TCT>TTT	ANA
2	2b	11916	A	T	A>T	AT->TA	5260	1	CDS	ND5	N>Y	AAT>TAT	TNA
3	3a	11997	C	A	C>A	CG->AT	12516	1	CDS	ND5	L>I	CTA>ATA	ANT
1	1b	12069	G	A	G>A	CG->TA	4893	1	CDS	ND5	G>S	GGT>AGT	GNG
2	2c	12069	G	A	G>A	CG->TA	13551	1	CDS	ND5	G>S	GGT>AGT	GNG
3	3c	12069	G	T	G>T	CG->AT	9280	1	CDS	ND5	G>C	GGT>TGT	GNG
3	3c	12070	G	A	G>A	CG->TA	9346	1	CDS	ND5	G>D	GGT>GAT	GNT
3	3b	12085	C	A	C>A	CG->AT	9108	1	CDS	ND5	A>E	GCA>GAA	TNC
1	1c	12201	C	T	C>T	CG->TA	6422	1	CDS	ND5	L>F	CTT>TTT	ANT
2	2b	12226	C	A	C>A	CG->AT	7260	1	CDS	ND5	A>E	GCA>GAA	TNC
2	2b	12269	C	T	C>T	CG->TA	7499	1	CDS	ND5	Syn	GCC>GCT	GNG
3	3a	12273	A	T	A>T	AT->TA	10799	1	CDS	ND5	T>S	ACA>TCA	CNC
3	3a	12281	G	A	G>A	CG->TA	10638	1	CDS	ND5	Syn	GTG>GTA	TNA
3	3b	12313	C	T	C>T	CG->TA	5932	1	CDS	ND5	T>I	ACA>ATA	TNT
1	1c	12403	T	C	T>C	AT->GC	19394	2	CDS	ND5	I>T	ATA>ACA	TNT
2	2c	12435	G	T	G>T	CG->AT	20556	1	CDS	ND5	E>*	GAA>TAA	ANA
3	3c	12450	G	A	G>A	CG->TA	29683	1	CDS	ND5	V>M	GTG>ATG	GNT
1	1c	12478	T	C	T>C	AT->GC	36789	1	CDS	ND5	I>T	ATA>ACA	TNT
2	2a	12505	T	C	T>C	AT->GC	16504	1	CDS	ND5	L>P	CTA>CCA	TNG
1	1c	12517	T	A	T>A	AT->TA	39156	1	CDS	ND5	F>Y	TTT>TAT	ANA
3	3c	12546	G	T	G>T	CG->AT	33437	5	CDS	ND5	A>S	GCT>TCT	TNC
3	3c	12551	G	T	G>T	CG->AT	33698	1	CDS	ND5	L>F	TTG>TTT	TNT
3	3c	12667	T	C	T>C	AT->GC	15878	1	CDS	ND5	I>T	ATA>ACA	TNT
3	3c	12676	C	T	C>T	CG->TA	14194	1	CDS	ND5	T>I	ACC>ATC	GNT
